# Supplementary material
Source: PubMed Central journal article supplement (PMC4781666)

mean  $\pm$  sd derived from 3 replicate samples. Panels b and d are images of agarose gel electrophoresis showing single band of the PCR products. Ctrl, control siRNA; IP, immunoprecipitation; F/F, *Frs2 $\alpha$ <sup>fllox</sup>*; CN, *Frs2 $\alpha$ <sup>CN</sup>*; \*,  $P < 0.05$ .

**Online Fig. 1. Depletion of FRS2 $\alpha$  compromises the tumorigenicity of MDA PCa 118b cells.** **A.** Real-time RT-PCR analyses of MDA PCa 118b cells infected with shFRS2 $\alpha$  (n=6) control (n=6) adenoviruses. **B&C.** X-ray analyses of mouse femurs 7 weeks after injection of  $1.5 \times 10^6$  of the indicated cells. Investigators were blinded when assessing the bone lesions and blood vessels. The tumor incidence rates were calculated and expressed as mean  $\pm$  sd (B). Representative images are shown in (C). **D.** Immunostaining of tumor sections with anti-CD31 antibodies. Panel c is the average percent of CD31 stained areas in randomly viewed areas. Ctrl, control virus infected PC3 cells; \*,  $P < 0.05$ .

**Online Fig. 2. Validation of antibodies used for immunostaining.** **A&B.** Immunostaining of HIF1 $\alpha$ , FRS2 $\alpha$ , phosphorylated FRS2 $\alpha$ , and cJun. Expression of HIF1 $\alpha$  in PC3 cells was induced by treating the cells with 150  $\mu$ M CoCl<sub>2</sub> in DEMEM containing 2% serum for 24 hours. Untreated cells were used as a negative control for anti-HIF1 $\alpha$  antibody. For anti-FRS2 $\alpha$  staining anti-phosphorylated FRS2 $\alpha$ , and anti-cJUN, the siRNA depleted cells were used as negative controls. **C.** The human PCa tissue section was co-stained with anti-CD31 antibody and isolectin. The images were captured with a confocal microscope. The data showed that both anti-CD31 and

isolectin stained the same areas of the section, indicating that anti-CD31 antibody specifically recognized endothelial cells in the tissue. To-Pro3 (TP3) was used for nuclear counterstaining. Ctrl, control.

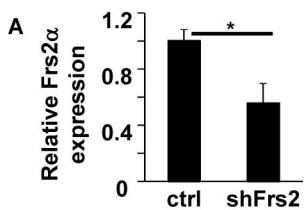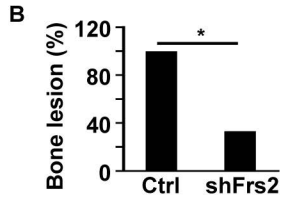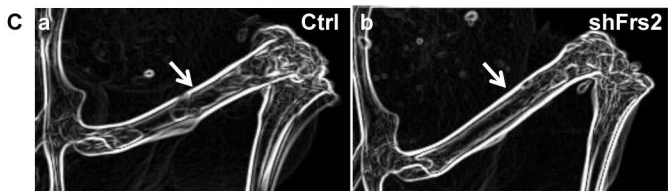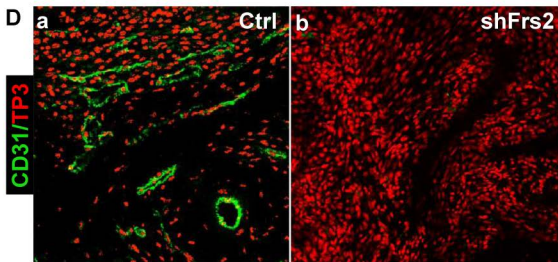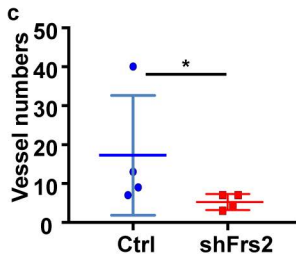

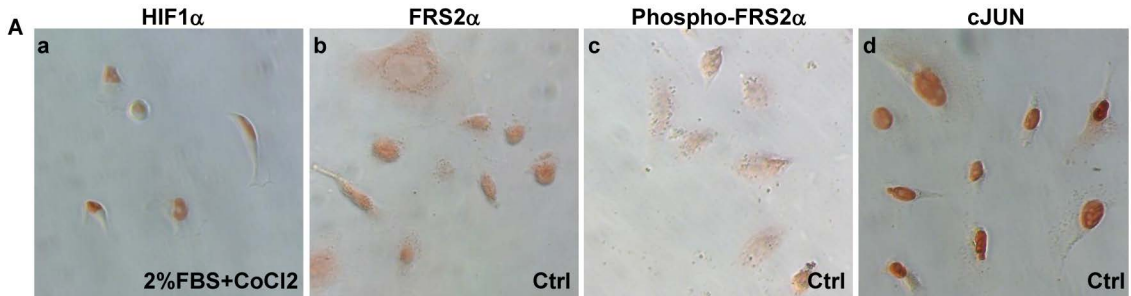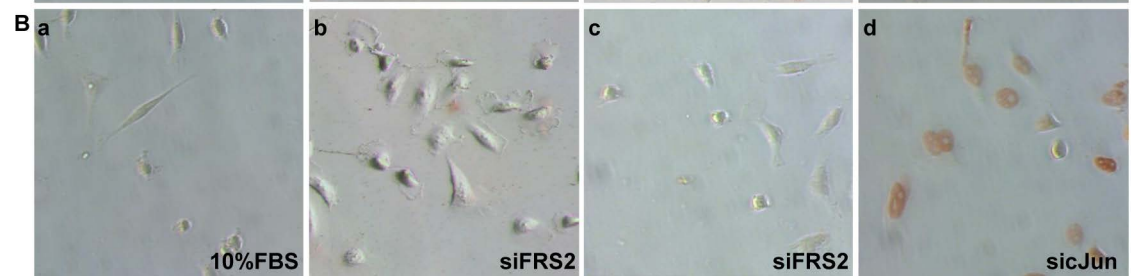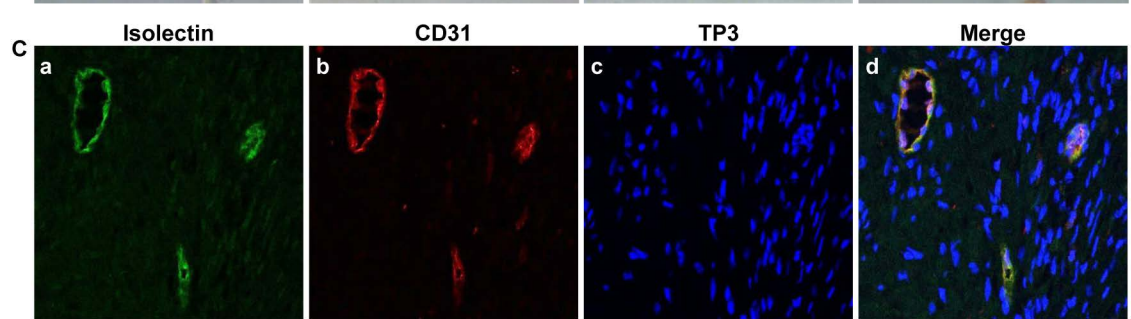

Supplement: NIHMS764077-supplement-supplement_1.pdf [file NIHMS764077-supplement-supplement_1.pdf]
